# Supplementary material for: Ectopic GRHL2 Expression Due to Non-coding Mutations Promotes Cell State Transition and Causes Posterior Polymorphous Corneal Dystrophy 4
Source: PubMed Central journal article supplement (PMC5985340; doi:10.1016/j.ajhg.2018.02.002), 2018-03-01
Supplement: mmc1.pdf [file mmc1.pdf]

**Supplemental Data**

**Ectopic *GRHL2* Expression Due to Non-coding  
Mutations Promotes Cell State Transition and  
Causes Posterior Polymorphous Corneal Dystrophy 4**

**Petra Liskova, Lubica Dudakova, Cerys J. Evans, Karla E. Rojas Lopez, Nikolas Pontikos, Dimitra Athanasiou, Hodan Jama, Josef Sach, Pavlina Skalicka, Viktor Stranecky, Stanislav Knoch, Caroline Thaug, Martin Filipec, Michael E. Cheetham, Alice E. Davidson, Stephen J. Tuft, and Alison J. Hardcastle**

## Supplemental Data

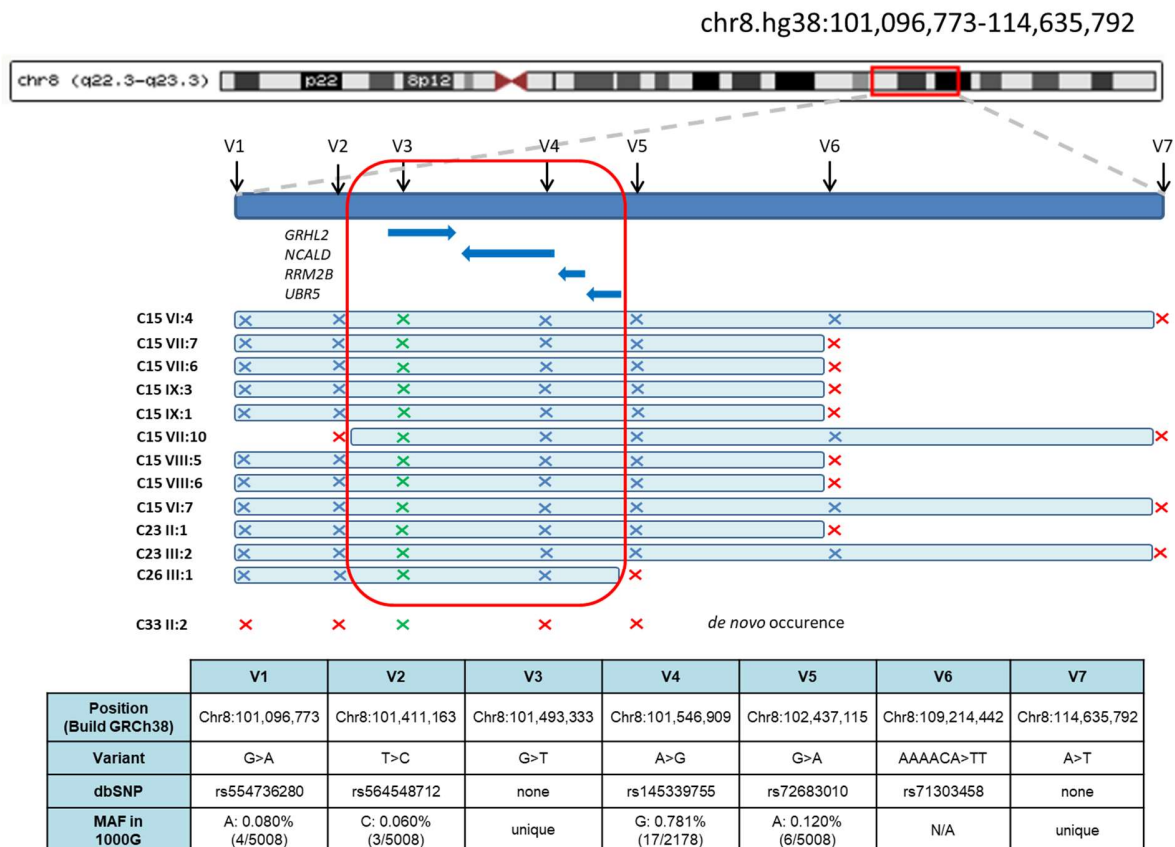

### Figure S1. Ancestral mini-haplotype of 3 families of Czech origin

Rare variants V1, V2, V4-V7 (see table at bottom of schematic haplotype) selected within the PPCD4 linked region (filled blue rectangles) were genotyped in individuals from families C15, C23 and C26 with the same *GRHL2* mutation (V3, green cross). Recombination event (red cross) were identified in family C15 that refined the locus and associated mini-haplotype. The same mini-haplotype was identified in families C23 and C26, with an additional recombination events, that suggests the *GRHL2* mutation in these families arose in a common ancestor. This ancestral mini-haplotype was absent in affected individual II:2 from family C33, who had the same *GRHL2* mutation that occurred *de novo*.

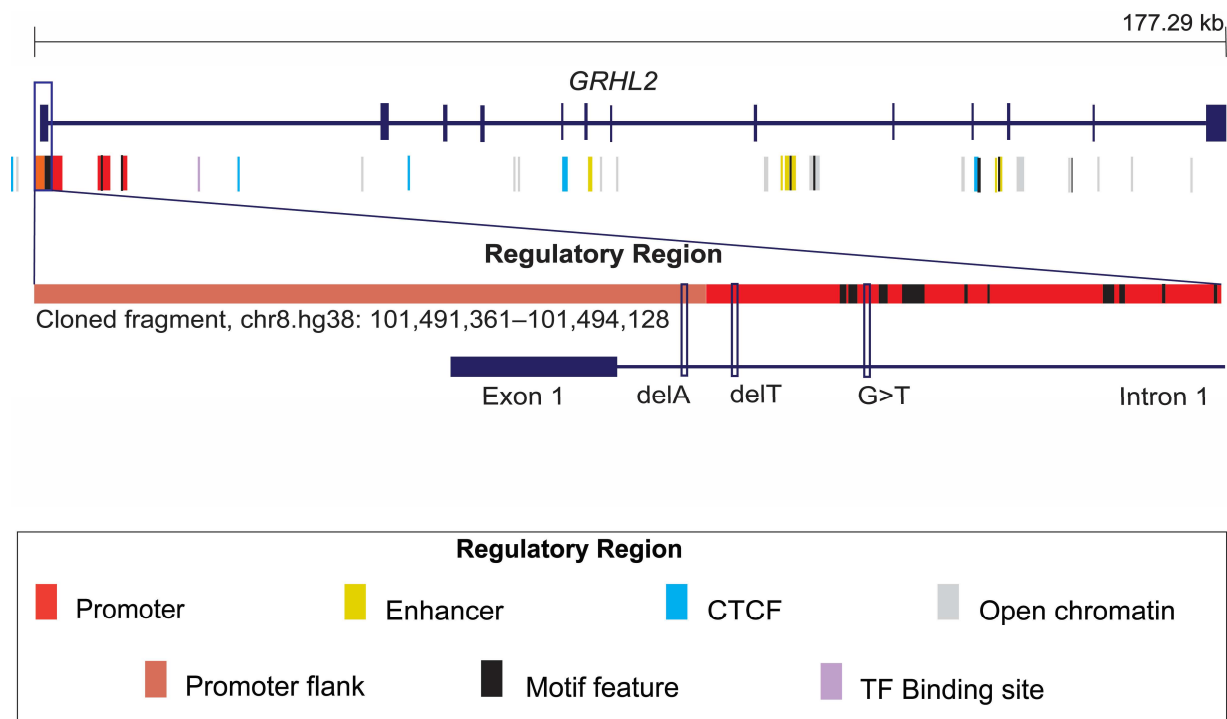

**Figure S2. Schematic representation of the regulatory region surrounding the three *GRHL2* promoter mutations**

*GRHL2* gene structure showing regulatory element annotations from the Ensembl Regulatory Build, colored by feature. Zoom-in view of the intron 1 region encompassing all 3 mutations showing they fall within a predicted promoter region. The image is extracted from Ensembl v90 using GRCh38 assembly and GENCODE v22 gene annotations. G>T represents c.20+544G>T, delT represents c.20+257delT, delA represents c.20+133delA. Mutations are annotated in accordance with the *GRHL2* cDNA sequence (Ensembl: ENST00000251808.7). Red bar represents the regulatory region (2,728 bp) sequenced in unsolved PPCD patients and cloned for the luciferase assay.

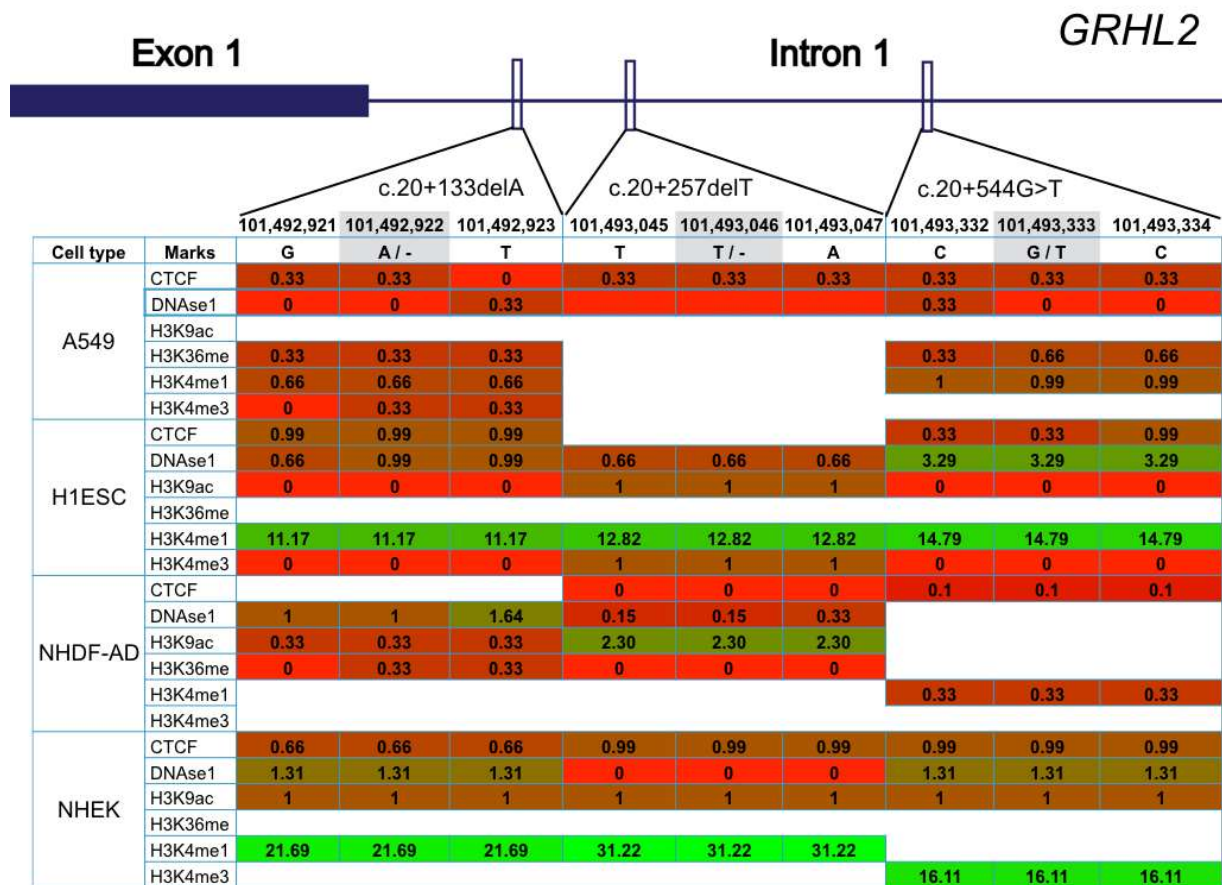

**Figure S3. Promoter features at the positions of the three intron 1 *GRHL2* mutations**  
 Zoomed-in view of promoter features for each of the 3 mutation positions within intron 1 of *GRHL2*. PChI-C data from 4 cell types (A549 - epithelial lung carcinoma; H1ES - human embryonic stem cells; NHDF-AD - adult dermal fibroblasts; NHEK - normal human epidermal keratinocytes), and chromatin features based on ChromHMM segmentations of BLUEPRINT histone modification data are shown. PChI-C data displays features such as DNase1 or CTCF binding sites. ChromHMM histone states for: H3 lysine 4 trimethylation (H3K4me3), H3 lysine4monomethylation (H3K4me1), H3 lysine 36 trimethylation (H3K36me3) for actively transcribed regions are shown. H3 lysine 9 acetylation is associated with promoter regions. The image is based on Ensembl v90 using GRCh38 assembly. Mutations are annotated in accordance with the *GRHL2* cDNA sequence (Ensembl: ENST00000251808.7). Brightness of colors (red and green, brighter = stronger) and numbers in boxes represent scores of relative strength of features.

**A**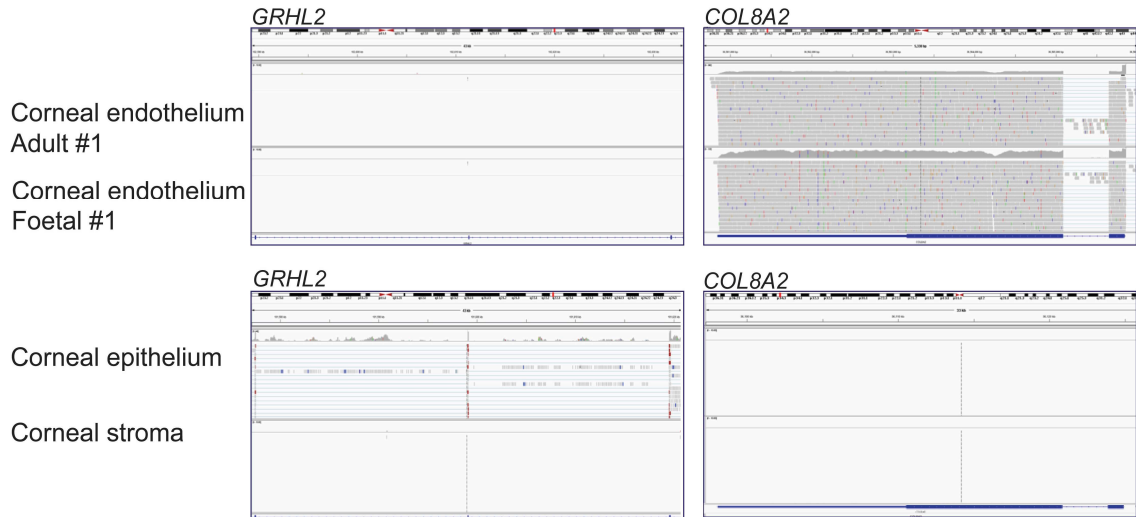**B**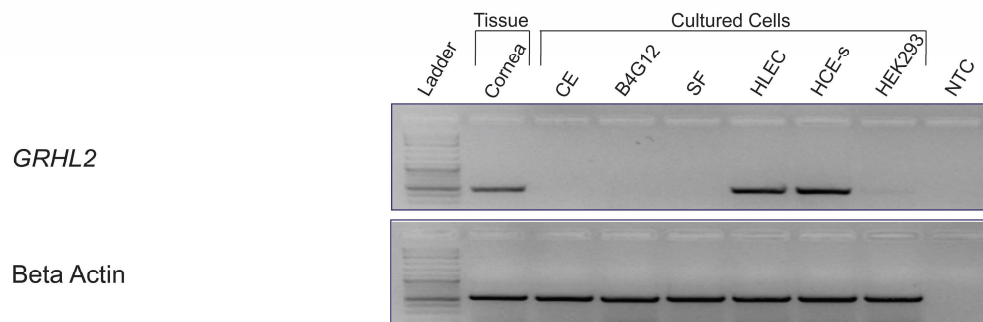**Figure S4. Expression of *GRHL2* in different layers of the human cornea**

**(A)** Interrogation of RNA-seq data derived from adult and fetal human corneal endothelial samples revealed no evidence of *GRHL2* expression. *COL8A2* is highly expressed in corneal endothelium. *GRHL2* is expressed only in the corneal epithelium and not expressed in stroma. **(B)** RT-PCR of corneal tissue and cell types indicates *GRHL2* is expressed in full thickness cornea, human corneal epithelial cells (HCE-s), human limbal epithelial cells (HLEC). No expression was detected in cultured endothelial cells (CE and B4G12) or stromal cells (SF). NTC = no template control.

**Table S1. *In silico* predictions of the consequence of *GRHL2* variants on transcription factor binding**

AliBaba<sup>1</sup> 2.1 predicts transcription factor binding sites in an unknown DNA sequence utilizing the TRANSFAC public database. MatInspector<sup>2</sup> utilizes a large library of matrix descriptions for transcription factor binding sites to locate matches in DNA sequences. \*RKPM values also encompass flanking transcripts. All 3 mutations were predicted to alter transcription factor binding (loss and gain).

| Transcription factor     | C15, C23, C26, C33<br>c.20+544G>T | B4<br>c.20+257delT       | B5<br>c.20+133delA       | Expression in endothelium (RKPM) |       |
|--------------------------|-----------------------------------|--------------------------|--------------------------|----------------------------------|-------|
|                          |                                   |                          |                          | Adult                            | Fetal |
| SP1                      | Site lost <sup>1</sup>            |                          |                          | 12.52                            | 17.53 |
| NRF1*                    | 4 sites lost <sup>2</sup>         |                          |                          | 9.31                             | 12.78 |
| ESRRA*                   | Site gained <sup>2</sup>          |                          |                          | 41.52                            | 8.74  |
| GLIS1                    | Site gained <sup>2</sup>          |                          |                          | 42.75                            | 3.19  |
| AHR                      | Site lost <sup>2</sup>            |                          |                          | 32.84                            | 28.87 |
| MYC                      | Site lost <sup>2</sup>            |                          |                          | 25.00                            | 5.98  |
| E2F2                     | Site lost <sup>2</sup>            |                          |                          | 0.07                             | 1.44  |
| E2F3                     | Site gained <sup>2</sup>          |                          |                          | 0.17                             | 0.02  |
| EBF1                     |                                   | Site lost <sup>2</sup>   |                          | 0.05                             | 5.98  |
| POZ/zinc finger proteins | Site lost <sup>2</sup>            | Site gained <sup>2</sup> |                          | N/A                              | N/A   |
| STAT6                    |                                   | Site gained <sup>2</sup> |                          | 27.53                            | 21.94 |
| ZNF354C                  |                                   |                          | Site lost <sup>2</sup>   | 3.53                             | 5.61  |
| GLI3                     |                                   |                          | Site gained <sup>2</sup> | 20.15                            | 14.68 |
| ZBTB7A                   |                                   |                          | Site gained <sup>2</sup> | 17.91                            | 7.01  |
